# Supplementary material for: The first complete genomic structure of Butyrivibrio fibrisolvens and its chromid
Source: PubMed Central journal article supplement (PMC6249431; doi:10.1099/mgen.0.000216), 2018-09-14
Supplement: mgen-4-216-s001.pdf [file mgen-4-216-s001.pdf]

# Supplementary material - File S1.

## Section 1

### Bacterial isolation and growth condition

The isolation of *Butyrivibrio fibrisolvens* strain INBov1 was carried out at the Institute of Pathobiology from the National Institute of Agriculture and Livestock Technology (INTA) in Argentina. *B. fibrisolvens* INBov1 was originally isolated from a Holstein cow provided with a ruminal fistula and fed on a lucerne pasture. Rumen contents were homogenized under a CO<sub>2</sub> atmosphere and filtered through two layers of gauze. The strained samples were diluted until 10<sup>-10</sup> with anaerobic mineral solution (phosphate and mineral salts). For isolation, 0.2 ml of serial dilutions 10<sup>-7</sup> to 10<sup>-10</sup> were inoculated into solid pre-reduced media prepared by means of roll-tube technique, based on the roll tubes procedure of Hungate (1966) [1]. These culture media described by Grubb and Dehority (1976) [2] contained 40% clarified rumen fluid, 7% volatile fatty acids (VFA), 0.025% glucose, 0.025% maltose, 0.025% starch, 0.025% cellobiose, 0.25% yeast extract, and 1.5% agar together with other components recommended by Cerón (2014) [3]. The culture was grown in anaerobic conditions, at 39°C during 5 days. Well-isolated colonies obtained from the roll tubes with the highest dilution were subsequently re-isolated. The pure isolated colonies were cultured in liquid medium without ruminal fluids, plus 0.5% glucose, trypticase peptone, yeast extract, calcium carbonate and L-cysteine-HCL and mineral salts (Cerón, 2014) [3]. The culture was grown in anaerobic conditions, at 39°C during 2 days. Bacterial culture in liquid medium was pellet by centrifugation (8000 x 30 min) to perform DNA extraction.

### Genome sequencing and assembly

Different de novo assembly strategies were carried out with our complex dataset and then compared, including hybrid assemblies (using Illumina and 454 reads) and single technology assemblies (only Illumina or 454 reads separately). Several assemblers were tested (Newbler, Celera, Velvet, Abyss, SPAdes) and we also compared the usage of pre-trimmed reads to raw reads. Initially, the optical restriction map was used to validate the scaffolds obtained in each assembly trial by using *Soma v2* [4] to evaluate each trial's performance. The results of the alignments of the scaffolds' restriction sites consistent with the optical map (using map

42 data and *KpnI* restriction sites in scaffolds) were used to calculate the  
43 “percentage of map coverage,” which refers to the percentage of  
44 sequence assembled which aligns accordingly with the restriction map  
45 provided by the optical mapping results.. The percentage of map coverage  
46 was used along with the other metrics gathered from the assemblies'  
47 output (N50, number and size of contigs and scaffolds, coverage) to  
48 determine which trial provided the best result and, consequently, which  
49 scaffolds should be used in building the genomic sequence. In a later  
50 analysis, we were able to improve the results obtained in *Soma* by  
51 carrying out a manual alignment of the unplaced scaffolds using  
52 NEBcutter [5] and our own criteria (see File S1 in Supplementary Material)  
53 based on the work done by *Valouev et al. (2005)* [6] to decide which  
54 unplaced scaffolds to use in the genomic sequence. These criteria uses  
55 the error probability in the optical map technique, as explained in Valouev  
56 study, to evaluate the alignments of restriction fragments between the  
57 unplaced scaffolds and the restriction map.  
58

## 59 **Genome annotation**

60

61 The annotation of the genomic sequences was carried out by using  
62 the RAST server online [7]. We used the Classic RAST annotation scheme  
63 and RAST gene caller. We selected tasks for automatic error correction,  
64 frameshifts correction and backfill of gaps.

65 The genome expected size is estimated by the optical map  
66 restriction which resulted in 4,327,514 bp, very similar to the one  
67 estimated by the kmer distribution using Illumina PE reads, which is  
68 4,407,001 bp. The optical map expected size is for the main chromosome  
69 only, whereas, the kmer spectrum would be for the entire genome content  
70 given the genome sequences are present in similar copy numbers.  
71 Moreover, using the kmer spectrum distribution, we analyzed how much  
72 coverage we obtained with our different sequencing runs; the 454 PE data  
73 provided 6X average coverage, and the 454 SE data signified an average  
74 coverage of 11X. As for the Illumina PE data, this provided 74X average  
75 coverage. All kmer-based estimation was performed as described by the  
76 Computational Biology Core of the Institute for Systems Genomics from  
77 the University of Connecticut [8].  
78

## 79 **Phenotypic characterization and 16S rRNA gene analysis**

80

81 The INBov1 isolate was classified as a *Butyrivibrio fibrisolvens* strain  
82 based on its morphologic and metabolic characteristics. We also used  
83 EzBioCloud’s database species identification service [9] to confirm the

84 species identity of INBov1 strain through the analysis of its 16S rRNA  
85 sequence.

86  
87 Growth was achieved only anaerobically. Gram staining showed  
88 Gram-negative rod-shaped bacteria and cell motility was observed.  
89 INBov1 was able to grow using glucose, cellobiose, maltose, cellulose,  
90 pectin, and xylan as carbon source but was unable to utilize starch and  
91 cellulose with a strip of filter paper (Whatman N1). Typically, the isolate  
92 was able to produce butyric acid. The analysis we conducted using  
93 EzBioCloud's database identification service showed that the INBov1 16S  
94 rRNA sequence (GenBank: JN642599.1) was most similar to the 16S rRNA  
95 gene of the *B. fibrisolvens* strain NCDO 2221<sup>T</sup> (ATCC 19171<sup>T</sup>), which the  
96 EzBioCloud server uses as the *B. fibrisolvens* strain type (GenBank:  
97 X89970.1). The sequence similarity value was 98.82% which is higher  
98 than 98.7%, the species threshold suggested by several authors for 16S  
99 rRNA sequence identity [10] [11]. This result indicates that INBov1 strain  
100 is correctly classified as a *B. fibrisolvens* species which is also supported  
101 by the genome properties (see "Genome properties and statistics" section  
102 in the main article) and the morphologic and metabolic characteristics  
103 observed in the culture.

104

## 105 **Assembly discussion**

106

107 We set out to compare the performance of the different assembly  
108 methods using our different datasets. We started by assembling all our  
109 454 reads with the Newbler assembler, which is the native assembler of  
110 Roche 454 [12], in which we obtained 25 scaffolds, compared to the 28  
111 scaffolds when running Newbler with the Illumina and 454 reads together.  
112 Trials with other assemblers, included using the Celera WGS assembler  
113 [13] with Illumina reads, followed by scaffolding with 454 mate pair reads  
114 using SPAdes [14], which produced in between 200 and 3000 scaffolds  
115 with a low map coverage of less than 40% when the scaffolds were  
116 aligned to the restriction map (see Table S1 in Section 2). Ultimately, we  
117 concluded that the addition of the 454 mate pair reads was vital for  
118 scaffolding, and Newbler was by far the best software to scaffold 454  
119 mate pair reads. Moreover, given our dataset, the addition of Illumina  
120 reads in a hybrid assembly did not show an improvement in the results  
121 using Newbler. In fact, there was a lower performance when running  
122 Soma, obtaining a value of ~60% map coverage, as opposed to ~70%  
123 when only 454 reads were used. After the manual alignment of unplaced  
124 scaffolds, however, both trials presented similar values of map coverage  
125 of around 95% (see [Table S1](#)). Even though we were able to obtain a

126 similar percentage of map coverage with both trials, we kept the assembly  
127 of Newbler with 454 data alone in order to leave the Illumina reads for  
128 gap-closing in a later analysis. A trial using only 454 SE reads in Newbler  
129 produced 226 contigs, demonstrating that the 454 MP reads were vital in  
130 producing a much shorter set of 25 scaffolds. Finally, 454 reads were used  
131 in raw format since a trial using pre-trimmed reads did not show a better  
132 result after further analyses. We used Newbler for the trimming and  
133 filtering process because it is the software designed for reads produced by  
134 454 technologies.

135

## 136 **Manual alignment of unplaced scaffolds using NEBcutter.** 137 **Methods and criteria.**

138

139 We used NEBcutter to generate restriction maps of the unplaced  
140 scaffolds with the aim of improving the results obtained in Soma. We  
141 uploaded the unplaced scaffolds to NEBcutter website and set the same  
142 endonuclease used in the optical map technique (KpnI). In a following  
143 step, we mapped the restriction maps of the scaffolds with the optical  
144 restriction map of the genome, focusing on those regions where no  
145 scaffold was placed by Soma.

146 The criteria we used took into account the main type of errors  
147 present in the optical map technique as described in *Valouev et al. (2005)*  
148 [6]. These errors include errors in the calculation of the restriction  
149 fragments, missing cuts, missing restriction fragments, false cuts and  
150 chimeric reads. Errors in calculation size occur because of uneven  
151 distribution of fluorochromes; fragments of more than 4 kb present a  
152 standard deviation value of  $\delta = 0.55$  (normal distribution model),  
153 fragments up to 4 kb follow a different statistical model with values of  $\delta =$   
154 2.2. Missing cuts in the map have a frequency of 20% since the efficiency  
155 of the endonucleases is 80%. Non-specific activity of the endonucleases  
156 causes false cuts in the DNA molecule and statistically follows the Poisson  
157 model with a non-specific cut frequency of  $\lambda = 0.005$  per kilobase of DNA.  
158 Missing restriction fragments in the optical map are very common when  
159 fragments are shorter than 2 kb because of the weak adhesion of the  
160 fragments to the glass surface during the technique. Another type of error  
161 is the one caused by chimeric reads when molecules of DNA of unrelated  
162 genomic regions cross. Chimeric reads are hard to identify and they are  
163 not addressed in Valouev work. Consequently, a scoring system is usually  
164 established to contemplate the chimeric reads in the optical map  
165 alignment algorithms.

166 Taking into account the aforementioned errors, we established the  
167 following criteria. We considered that a scaffold's restriction fragment was  
168 well aligned with a fragment of the optical map when its size had a

169 deviation equal to or less than  $\delta = 0.35$  for fragments smaller than 4 kb  
170 and  $\delta = 2.2$  for fragments larger than 4 kb. We used a value of 0.35  
171 instead of the value mentioned in Valouev study (0.55) to obtain results  
172 with higher statistic significance. The fragments at both ends of the  
173 scaffolds were an exception; they were accepted when their size was  
174 inferior to the limit imposed by the standard deviation since the possibility  
175 existed that they might be incomplete fragments.

176 For fragments that did not align, we evaluated whether the  
177 misalignment could have been caused by errors in the optical map. When  
178 a fragment was missing of a size smaller than 2 kb in the optical map, we  
179 considered the scaffold fragment as correctly aligned because of the high  
180 frequency of fragments missing smaller than 2 kb. In other misalignments,  
181 we evaluated whether the cause could have been missing or false cuts. If  
182 the misalignment was from missing or false cuts, we accepted the  
183 fragments only if the probability of these errors was greater than 50%. To  
184 estimate this probability, two parameters were calculated: “probable  
185 number of missing cuts” and “probable number of false cuts.” The first  
186 metric was calculated as 20% of the total number of restriction sites  
187 present in the map region where the scaffold was being aligned. The  
188 second parameter was calculated as the 0.5% of the map region size (in  
189 kilobases) where the scaffold was being aligned. When a misaligned  
190 fragment could not be caused by any of the technique errors mentioned,  
191 we considered that fragment a rejected fragment. We established cut-off  
192 values by accepting only scaffolds with more than 90% of fragments and  
193 base alignment with the map. Also, more than 90% of the fragments and  
194 bases of the map region had to align with the the scaffold. The cut-off  
195 values attempted to contemplate other types of errors in the optimal map  
196 technique that were hard to identify, such as the problem of chimeric  
197 reads and false cuts. According to our criteria, more than 94% of the  
198 restriction fragments from each scaffold we accepted aligned well with the  
199 map. Also, the restriction fragments that aligned well from a scaffold we  
200 accepted always represented more than 98% of the total scaffold bases.

201 During the process of manual mapping, we found that some large-  
202 sized scaffolds aligned accurately with regions of the map where Soma  
203 had placed small-sized scaffolds. We considered that the alignment of the  
204 large-sized scaffolds was statistically more significant since a larger  
205 number of fragments were aligned. As a result, the smaller scaffolds were  
206 removed and the larger ones were placed in the genomic sequence  
207 instead. The removed scaffolds were later mapped on to the free regions  
208 of the map using the same methodology and we were ultimately able to  
209 place most of the removed scaffolds in the genome sequence (see  
210 following subsection).

211

## 212 Results of the manual alignments.

213

214 As is shown in Fig.S1, we were able to place six new scaffolds  
215 (scaffolds 13, 14, 16, 3, 17 and 6). To place scaffolds 3 and 6, we removed  
216 scaffold 20 from region C and scaffolds 18 and 21 from region D. In a  
217 following step, we were able to relocate scaffolds 18 and 21 in region C  
218 and D, respectively. Scaffold 20 was left out of the final sequence together  
219 with the rest of the unplaced scaffolds (8, 19, 21 and 23).

220

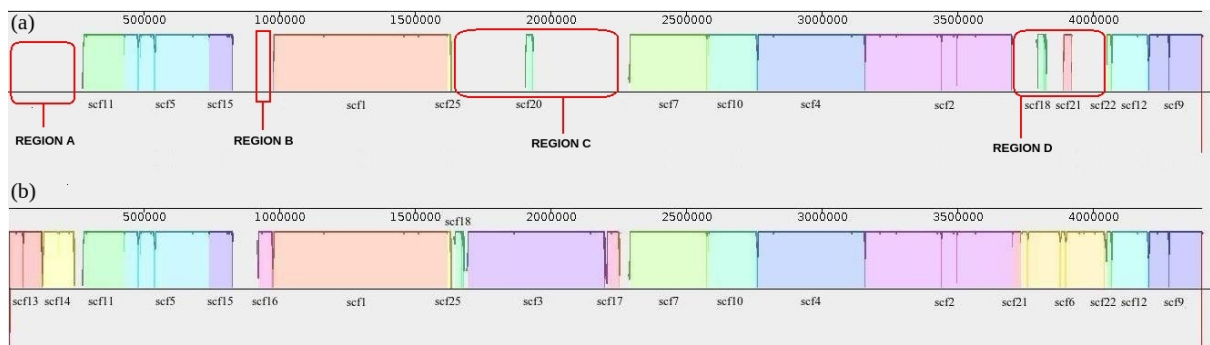

221

222 [Fig.S1](#). Progress of the genomic sequence, visualized with Mauve program.  
223 Before (a) and after (b) the manual placing of scaffolds with NEBcutter.  
224 The regions where new scaffolds were placed are shown (regions A, B, C  
225 and D).

226

227 The scaffold 8 is a large sequence (266.542 bp) that did not align  
228 with any region of the optical map, not even partially. After the annotation  
229 process, we also found the presence of repA gene, highly characteristic in  
230 plasmids since it codifies an initiator factor that it is essential in the  
231 replication system of plasmids [15] [16].

232 The alignment information of the manually placed scaffolds is shown  
233 in the Section 2 of this document.

234

## 235 Construction of the genomic sequence.

236 After the manual alignment, we calculated the position of the newly  
237 placed scaffolds in the optical map as the gap distance present between  
238 them and their respective contiguous scaffolds. Using this data, we edited  
239 the output table provided by Soma in the alignment to reconstruct the  
240 genome sequence. The table indicates the identity and order of the  
241 scaffolds placed in the optical restriction map and the gap distance  
242 between adjacent scaffolds. An in-house script used the information from

243 the table to place the scaffold sequences and add the gap sequences  
244 accordingly. With this script, we created a file with the genome sequence  
245 in fasta format. In a final step, we used GapCloser again to close some  
246 gaps between the scaffolds using the Illumina PE reads (see Fig.S2).

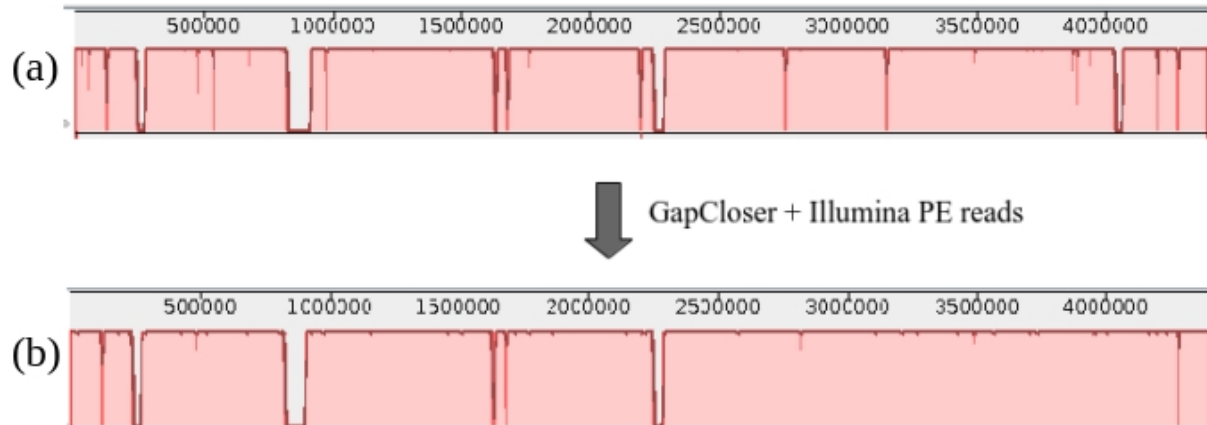

247

248 [Fig.S2](#). Progress of the genome sequence before (a) and after (b) closing  
249 gaps with the GapCloser program (34% of the gaps were closed). The final  
250 genome sequence contains 96% of the estimated genome information. Its  
251 size is 4.398.850 bp and it contains 163.074 unidentified bases.

252

## 253 REFERENCES

254 **1. Hungate RE.** *The rumen and its microbes.* Academic Press, New York  
255 and London. 1966.

256 **2. Grubb JA, Dehority BA.** *Variation in colony counts of total viable*  
257 *anaerobic rumen bacteria as influenced by media and cultural methods.*  
258 *Applied and Environmental Microbiology.* 1976;31(2):262-267.

259 **3. Cerón Cucchi M.E.** “*Estudio de la diversidad microbiana del*  
260 *compartimento (C1) del sistema digestivo de la llama (Lama glama)*”.  
261 *Tesis para optar el título de Doctor de la Facultad de Farmacia y*  
262 *Bioquímica, Universidad de Buenos Aires. Buenos Aires, Argentina. 2014.*

263 **4. Nagarajan N, Read TD, Pop M.** *Scaffolding and validation of*  
264 *bacterial genome assemblies using optical restriction maps.*  
265 *Bioinformatics.* 2008;24(10):1229-1235.  
266 [doi:10.1093/bioinformatics/btn102](https://doi.org/10.1093/bioinformatics/btn102).

267 **5. Vincze T, Posfai J, Roberts RJ.** *NEBcutter: a program to cleave DNA*  
268 *with restriction enzymes.* *Nucleic Acids Research.* 2003;31(13):3688-  
269 3691.

270 **6. Valouev A, Li L, Liu Y, Schwartz D, Yang Y, Zhang Y, Waterman**  
271 **M.** *Journal of Computational Biology.* April 2006, 13(2): 442-  
272 462. <https://doi.org/10.1089/cmb.2006.13.442>

273 **7. Aziz RK, Bartels D, Best AA, et al.** The RAST Server: Rapid  
274 Annotations using Subsystems Technology. *BMC Genomics*. 2008;9:75.  
275 doi:10.1186/1471-2164-9-75.

276 **8. Genome Size Estimation Tutorial.** Institute for Systems Genomics  
277 from the University of Connecticut <  
278 <http://bioinformatics.uconn.edu/genome-size-estimation-tutorial> >  
279 Accessed 2018 January 16.

280 **9. Yoon S, Ha S, Kwon S, Lim J, Kim Y, Seo H and Chun J. (2017).**  
281 Introducing EzBioCloud: a taxonomically united database of 16S rRNA  
282 gene sequences and whole-genome assemblies. *Int J Syst Evol Microbiol*  
283 67(5):1613-1617 doi:10.1099/ijsem.0.001755

284 **10. Stackebrandt, E. & Ebers, J.** Taxonomic parameters revisited:  
285 tarnished gold standards. *Microbiol. Today* 8, 6–9 (2006).

286 **11. Yarza P, Yilmaz P, Pruesse E., Glöckner F. O., Ludwig W.,**  
287 **Schleifer K.-H., et al. (2014).** Uniting the classification of cultured and  
288 uncultured bacteria and archaea using 16S rRNA gene sequences. *Nat.*  
289 *Rev. Microbiol.* 12 635–645. doi:10.1038/nrmicro3330

290 **12. Margulies M, Egholm M, Altman WE, et al.** Genome Sequencing  
291 in Open Microfabricated High Density Picoliter Reactors. *Nature*.  
292 2005;437(7057):376-380. doi:10.1038/nature03959.

293 **13. Myers EW, Sutton GG, Delcher AL, et al.** A whole-genome  
294 assembly of *Drosophila*. *Science*. 2000;287:2196–204.  
295 doi:10.1126/science.287.5461.2196

296 **14. Nurk S, Bankevich A, Antipov D, et al.** Assembling Single-Cell  
297 Genomes and Mini-Metagenomes From Chimeric MDA Products. *Journal of*  
298 *Computational Biology*. 2013;20(10):714-737.  
299 doi:10.1089/cmb.2013.0084.

300 **15. Chatteraj DK, Snyder KM, Abeles AL.** P1 plasmid replication:  
301 multiple functions of RepA protein at the origin. *Proceedings of the*  
302 *National Academy of Sciences of the United States of America*.  
303 1985;82(9):2588-2592.

304 **16. Harrison PW, Lower RP, Kim NK, et al.** Introducing the bacterial  
305 'chromid': not a chromosome, not a plasmid. *Trends in Microbiology*,  
306 Volume 18, Issue 4, 141–148. 2010. doi:10.1016/j.tim.2009.12.010



## Section 2

**Table S1. Assembly output metrics.**

| Input data                              | assembler | Assembly metrics  |          |           |          |         |          | SOMA alignments |                   |              | After manual alignments with NEBCUTTER |                   |              |
|-----------------------------------------|-----------|-------------------|----------|-----------|----------|---------|----------|-----------------|-------------------|--------------|----------------------------------------|-------------------|--------------|
|                                         |           | assembly type     | coverage | scaffolds | N50 scfs | contigs | N50 ctgs | seqs placed     | bases placed (bp) | map coverage | seqs placed                            | bases placed (bp) | map coverage |
| 454 SE                                  | Newbler   | single technology | 11X      | -         | -        | 270     | 39776    | 46              | 1989639           | 45.98%       | -                                      | -                 | -            |
| 454 SE trimmed                          | Newbler   | single technology | 11X      | -         | -        | 277     | 37617    | -               | -                 | < 40,00%     | -                                      | -                 | -            |
| 454 SE + 454 MP                         | Newbler   | single technology | 17X      | 25        | 310360   | 215     | 55288    | 13              | 2987074           | 69.03%       | 17                                     | 4157345           | 96.07%       |
| 454 SE trimmed + 454 MP                 | Newbler   | single technology | 17X      | 26        | 307673   | 209     | 55288    | 14              | 2984582           | 68.97%       | -                                      | -                 | -            |
| 454 SE + 454 MP + IL PE trimmed         | Newbler   | hybrid assembly   | 91X      | 28        | 281256   | 225     | 79597    | 14              | 2518157           | 58.19%       | 18                                     | 4126807           | 95.36%       |
| 454 SE + 454 MP + IL PE                 | Newbler   | hybrid assembly   | 91X      | 28        | 281130   | 219     | 71704    | 12              | 1827796           | 42.24%       | -                                      | -                 | -            |
| 454 SE trimmed + 454 MP + IL PE trimmed | Newbler   | hybrid assembly   | 91X      | 29        | 304455   | 231     | 71750    | -               | -                 | < 40,00%     | -                                      | -                 | -            |
| IL PE                                   | Newbler   | single technology | 74X      | 130       | 55331    | 307     | 48292    | 37              | 2051750           | 47.41%       | -                                      | -                 | -            |
| IL PE + 454 SE + 454 MP                 | SPAdes    | hybrid assembly   | 91X      | 220       | -        | -       | -        | -               | -                 | < 40,00%     | -                                      | -                 | -            |
| IL PE                                   | Celera    | single technology | 91X      | 582       | -        | -       | -        | -               | -                 | < 40,00%     | -                                      | -                 | -            |
| IL PE + 454 SE + 454 MP                 | Celera    | hybrid assembly   | 91X      | 1000      | -        | -       | -        | -               | -                 | < 40,00%     | -                                      | -                 | -            |
| IL PE + 454 SE + 454 MP                 | AbySS     | hybrid assembly   | 91X      | 594       | -        | -       | -        | -               | -                 | < 40,00%     | -                                      | -                 | -            |
| IL PE                                   | Velvet    | single technology | 74X      | 2946      | -        | -       | -        | -               | -                 | < 40,00%     | -                                      | -                 | -            |

Metrics are not shown when the assembly results showed a poor performance. We considered a poor performance any assembly trial that produced more than 200 scaffolds and showed less than 40% in map coverage after SOMA alignments.

**SE:** single-end reads **MP:** mate paired reads **trimmed:** reads pre-filtered and processed with Trimmomatic program **IL PE:** Illumina paired-end reads

**- Manual alignment information**

**(a) Manual alignment of scaffolds 13 (upper) and 14 (lower) with region A of the map.**

| scaffold fragments (kb) | optical map fragments (kb) | standard deviation | diff.  | region size (kb) | % deviated | observations                    | rejected fragments | probable N° of missing cuts | probable N° of false cuts | % accepted fragments | % accepted bases |
|-------------------------|----------------------------|--------------------|--------|------------------|------------|---------------------------------|--------------------|-----------------------------|---------------------------|----------------------|------------------|
| <b>SCF13 (Rv)</b>       | <b>REGION A</b>            |                    |        |                  |            |                                 |                    |                             |                           |                      |                  |
| 60.617                  | 42.704                     | 12.811             | 17.913 | 107.01           | 41.95%     | Ok (false cut)                  | 0                  | 1                           | 0.54                      | 100.00%              | 100.00%          |
| 6.549                   | 6.718                      | 2.015              | -0.169 |                  | -2.52%     | ok                              |                    |                             |                           |                      |                  |
| 37.069                  | 36.704                     | 11.011             | 0.365  |                  | 0.99%      | ok                              |                    |                             |                           |                      |                  |
| 16.269                  | 20.885                     | 6.266              | -4.616 |                  | -22.10%    | ok                              |                    |                             |                           |                      |                  |
| <b>SCF14 (Rv)</b>       | 3.614                      |                    |        |                  |            |                                 |                    |                             |                           |                      |                  |
| 4.013                   | 4.32                       | 1.296              | -0.307 | 119.30           | -7.11%     | ok                              | 0                  | 2                           | 0.60                      | 100.00%              | 100.00%          |
| 4.827                   | 4.738                      | 1.421              | 0.089  |                  | 1.88%      | ok                              |                    |                             |                           |                      |                  |
| 4.219                   | 4.679                      | 1.404              | -0.46  |                  | -9.83%     | ok                              |                    |                             |                           |                      |                  |
| 76.872                  | 78.18                      | 23.454             | -1.308 |                  | -1.67%     | ok                              |                    |                             |                           |                      |                  |
| 5.38                    | 7.325                      | 2.198              | -1.945 |                  | -26.55%    | ok                              |                    |                             |                           |                      |                  |
| 9.881                   | 10.294                     | 3.088              | -0.413 |                  | -4.01%     | ok                              |                    |                             |                           |                      |                  |
| 0.941                   |                            | -                  | 0.941  |                  | -          | Ok (missing frag.)              |                    |                             |                           |                      |                  |
| 0.24                    |                            | -                  | 0.24   |                  | -          | Ok (missing frag.)              |                    |                             |                           |                      |                  |
| 4.591                   | 1.992                      | 2.928              | -5.17  |                  | -259.54%   | Ok (false cut and end fragment) |                    |                             |                           |                      |                  |
|                         | 7.769                      |                    |        |                  |            |                                 |                    |                             |                           |                      |                  |

Tables (a), (b), (c) and (d) show, from left to right, the alignment of a scaffold restriction fragments with respective fragments in the map region. Fragment size is measured in kilobases. Rv and Fw provide each scaffold's orientation as it was aligned (**Rv**: reverse; **Fw**: forward). Fragments that aligned well are represented in green color, rejected fragments in red. Missing fragments are the most frequent error found (colored in light blue), the misalignments that were able to be explained because of false cuts or because they were end fragments are shown in orange color. Size deviations higher than 30% in alignments are colored in yellow. The observations column shows the criteria used to evaluate the alignments when such criteria was required.

**(b) Manual alignment of scaffold 16 with region B of the optical map.**

| scaffold fragments (kb) | optical map fragments (kb) | standard deviation | diff.  | region size (kb) | % deviated | observations       | rejected fragments | probable N° of missing cuts | probable N° of false cuts | % accepted fragments | % accepted bases |
|-------------------------|----------------------------|--------------------|--------|------------------|------------|--------------------|--------------------|-----------------------------|---------------------------|----------------------|------------------|
| <b>SCF16 (Rv)</b>       | <b>REGION B</b>            |                    |        |                  |            |                    |                    |                             |                           |                      |                  |
| 0.879                   | 1.715                      | 3.773              | -0.836 | 41.63            | -48.75%    | Ok (Frag. < 4 kb)  | 0                  | 1.6                         | 0.21                      | 100.00%              | 100.00%          |
| 7.629                   | 7.333                      | 2.200              | 0.296  |                  | 4.04%      | ok                 |                    |                             |                           |                      |                  |
| 10.936                  | 10.52                      | 3.156              | 0.416  |                  | 3.95%      | ok                 |                    |                             |                           |                      |                  |
| 0.103                   |                            | -                  | 0.103  |                  | -          | Ok (missing frag.) |                    |                             |                           |                      |                  |
| 4.067                   | 4.202                      | 1.261              | -0.135 |                  | -3.21%     | ok                 |                    |                             |                           |                      |                  |
| 6.228                   | 6.179                      | 1.854              | 0.049  |                  | 0.79%      | ok                 |                    |                             |                           |                      |                  |
| 11.445                  | 11.683                     | 3.505              | -0.238 |                  | -2.04%     | ok                 |                    |                             |                           |                      |                  |

(c) Manual alignment of scaffolds 18 (upper), 3 (middle) and 17 (lower) with region C of the map. Scaffold 18 is shown in blue to differentiate it from scaffold 3.

| scaffold fragments (kb) | optical map fragments (kb) | standard deviation | diff.  | region size (kb) | % deviated         | observations       | rejected fragments | probable N° of missing cuts | probable N° of false cuts | % accepted fragments | % accepted bases |
|-------------------------|----------------------------|--------------------|--------|------------------|--------------------|--------------------|--------------------|-----------------------------|---------------------------|----------------------|------------------|
| <b>SCF18 (Fw)</b>       | <b>REGION C</b>            |                    |        |                  |                    |                    |                    |                             |                           |                      |                  |
| 10.095                  | 14.549                     | 4.365              | -4.454 | 46.59            | -30.61%            | ok (end fragment)  | 0                  | 1.4                         | 0.23                      | 100.00%              | 100.00%          |
| 0.382                   |                            | 0.000              | 0.382  |                  | -                  | Ok (missing frag.) |                    |                             |                           |                      |                  |
| 1.378                   | 2.108                      | 0.632              | -0.73  |                  | -34.63%            | Ok (Frag. < 4 kb)  |                    |                             |                           |                      |                  |
| 14.226                  | 13.77                      | 4.131              | 0.456  |                  | 3.31%              | ok                 |                    |                             |                           |                      |                  |
| 3.953                   | 4.537                      | 1.361              | -0.584 |                  | -12.87%            | ok                 |                    |                             |                           |                      |                  |
| 3.459                   |                            | 3.489              | -8.17  |                  | -70.26%            | ok (end fragment)  |                    |                             |                           |                      |                  |
| <b>SCF3 (Rv)</b>        | 11.629                     |                    |        |                  |                    | gap                |                    |                             |                           |                      |                  |
| 10.44                   | 10.141                     | 0.203              | 0.299  | 418.27           | 2.95%              | ok                 | 2                  | 7                           | 2.09                      | 94.12%               | 98.81%           |
| 6.319                   | 6.125                      | 0.123              | 0.194  |                  | 3.17%              | ok                 |                    |                             |                           |                      |                  |
| 17.801                  | 17.371                     | 0.347              | 0.43   |                  | 2.48%              | ok                 |                    |                             |                           |                      |                  |
| 29.894                  | 29.224                     | 0.584              | 0.67   |                  | 2.29%              | ok                 |                    |                             |                           |                      |                  |
| 19.784                  | 19.201                     | 0.384              | 0.583  |                  | 3.04%              | ok                 |                    |                             |                           |                      |                  |
|                         | 2.279                      | 0.046              | -0.924 |                  | -40.54%            | rejected fragment  |                    |                             |                           |                      |                  |
| 1.355                   | 1.815                      | 0.036              | -0.46  |                  | -25.34%            | ok                 |                    |                             |                           |                      |                  |
| 20.563                  | 19.749                     | 0.395              | 0.814  |                  | 4.12%              | ok                 |                    |                             |                           |                      |                  |
| 6.482                   | 6.347                      | 0.127              | 0.135  |                  | 2.13%              | ok                 |                    |                             |                           |                      |                  |
| 16.496                  | 16.504                     | 0.330              | -0.008 |                  | -0.05%             | ok                 |                    |                             |                           |                      |                  |
| 44.66                   | 44.008                     | 0.880              | 0.652  |                  | 1.48%              | ok                 |                    |                             |                           |                      |                  |
| 4.114                   | 4.224                      | 0.084              | -0.11  |                  | -2.60%             | ok                 |                    |                             |                           |                      |                  |
| 25.981                  | 25.962                     | 0.519              | 0.019  |                  | 0.07%              | ok                 |                    |                             |                           |                      |                  |
| 3.497                   | 3.739                      | 0.075              | -0.242 |                  | -6.47%             | ok                 |                    |                             |                           |                      |                  |
| 1.198                   | 5.188                      | 0.104              | -3.99  |                  | -76.91%            | Ok (Frag. < 4 kb)  |                    |                             |                           |                      |                  |
| 13.813                  | 13.377                     | 0.268              | 0.436  |                  | 3.26%              | ok                 |                    |                             |                           |                      |                  |
| 11.104                  | 10.952                     | 0.219              | 0.152  |                  | 1.39%              | ok                 |                    |                             |                           |                      |                  |
| 10.304                  | 10.078                     | 0.202              | 0.226  |                  | 2.24%              | ok                 |                    |                             |                           |                      |                  |
| 20.922                  | 20.022                     | 0.400              | 0.9    |                  | 4.50%              | ok                 |                    |                             |                           |                      |                  |
| 0.908                   | 1.758                      | 0.035              | -0.85  |                  | -48.35%            | Ok (Frag. < 4 kb)  |                    |                             |                           |                      |                  |
| 19.298                  | 18.784                     | 0.376              | 0.514  |                  | 2.74%              | ok                 |                    |                             |                           |                      |                  |
| 13.179                  | 12.819                     | 0.256              | 0.36   |                  | 2.81%              | ok                 |                    |                             |                           |                      |                  |
| 16.67                   | 16.099                     | 0.322              | 0.571  |                  | 3.55%              | ok                 |                    |                             |                           |                      |                  |
| 1.767                   | 2.07                       | 0.041              | -0.303 |                  | -14.64%            | ok                 |                    |                             |                           |                      |                  |
| 7.187                   | 7.194                      | 0.144              | -0.007 |                  | -0.10%             | ok                 |                    |                             |                           |                      |                  |
| 5.969                   | 5.919                      | 0.118              | 0.05   |                  | 0.84%              | ok                 |                    |                             |                           |                      |                  |
| 25.487                  | 24.822                     | 0.496              | 0.665  |                  | 2.68%              | ok                 |                    |                             |                           |                      |                  |
| 7.329                   | 7.26                       | 0.145              | 0.069  |                  | 0.95%              | ok                 |                    |                             |                           |                      |                  |
|                         | 2.698                      | 0.054              | -2.698 |                  | -100.00%           | rejected fragment  |                    |                             |                           |                      |                  |
| 31.907                  | 30.628                     | 0.613              | 1.279  |                  | 4.18%              | ok                 |                    |                             |                           |                      |                  |
| 6.832                   | 6.774                      | 0.135              | 0.058  | 0.86%            | ok                 |                    |                    |                             |                           |                      |                  |
| 12.134                  | 12.493                     | 0.250              | -0.359 | -2.87%           | ok                 |                    |                    |                             |                           |                      |                  |
| 0.659                   |                            | 0.000              | 0.659  | -                | Ok (missing frag.) |                    |                    |                             |                           |                      |                  |
| 2.353                   | 2.643                      | 0.053              | -0.29  | -10.97%          | ok                 |                    |                    |                             |                           |                      |                  |
| 17.64                   | 17.086                     | 0.342              | 0.554  | 3.24%            | ok                 |                    |                    |                             |                           |                      |                  |
| <b>SCF17 (Fw)</b>       | 22.709                     | 0.454              | -1.135 | 92.67            | -5.00%             | ok                 | 0                  | 0.8                         | 0.46                      | 100.00%              | 100.00%          |
| 9.464                   | 52.874                     | 1.057              | -43.41 |                  | -82.10%            | ok (end fragment)  |                    |                             |                           |                      |                  |

(d) Manual alignment of scaffolds 21 (upper) and 6 (lower) with region D of the map.

| scaffold fragments (kb) | optical map fragments (kb) | standard deviation | diff.  | region size (kb) | % deviated | observations       | rejected fragments | probable N° of missing cuts | probable N° of false cuts | % accepted fragments | % accepted bases |
|-------------------------|----------------------------|--------------------|--------|------------------|------------|--------------------|--------------------|-----------------------------|---------------------------|----------------------|------------------|
| <b>SCF21 (Fw)</b>       | <b>REGION D</b>            |                    |        |                  |            |                    |                    |                             |                           |                      |                  |
| 12.011                  | 12.774                     | 0.255              | -0.763 | 29.21            | -5.97%     | ok                 | 0                  | 1                           | 0.15                      | 100.00%              | 100.00%          |
| 17.24                   | 16.437                     | 0.329              | 0.803  |                  | 4.89%      | ok                 |                    |                             |                           |                      |                  |
| 0.209                   |                            | 0.000              | 0.209  |                  | -          | Ok (missing frag.) |                    |                             |                           |                      |                  |
| 0.41                    |                            | 0.000              | 0.41   |                  | -          | Ok (missing frag.) |                    |                             |                           |                      |                  |
| <b>SCF6 (Fw)</b>        | <b>3.71</b>                |                    |        |                  |            |                    |                    |                             |                           |                      |                  |
| 0.877                   |                            | 0.074              | -2.833 | 307.43           | -76.36%    | ok (end fragment)  | 1                  | 5.4                         | 0.00                      | 96.15%               | 99.39%           |
| 3.783                   | 3.357                      | 0.067              | 0.426  |                  | 12.69%     | ok                 |                    |                             |                           |                      |                  |
|                         | 1.874                      | 0.037              | -1.874 |                  | -100.00%   | rejected fragment  |                    |                             |                           |                      |                  |
| 4.313                   | 4.535                      | 0.091              | -0.222 |                  | -4.90%     | ok                 |                    |                             |                           |                      |                  |
| 0.581                   |                            | 0.000              | 0.581  |                  | -          | Ok (missing frag.) |                    |                             |                           |                      |                  |
| 1.704                   | 1.787                      | 0.036              | -0.083 |                  | -4.64%     | ok                 |                    |                             |                           |                      |                  |
| 5.952                   | 5.983                      | 0.120              | -0.031 |                  | -0.52%     | ok                 |                    |                             |                           |                      |                  |
| 5.011                   | 4.835                      | 0.097              | 0.176  |                  | 3.64%      | ok                 |                    |                             |                           |                      |                  |
| 21.875                  | 21.318                     | 0.426              | 0.557  |                  | 2.61%      | ok                 |                    |                             |                           |                      |                  |
| 10.249                  | 9.877                      | 0.198              | 0.372  |                  | 3.77%      | ok                 |                    |                             |                           |                      |                  |
| 0.734                   | 1.492                      | 0.030              | -0.758 |                  | -50.80%    | Ok (Frag. < 4 kb)  |                    |                             |                           |                      |                  |
| 18.276                  | 17.75                      | 0.355              | 0.526  |                  | 2.96%      | ok                 |                    |                             |                           |                      |                  |
| 4.493                   | 4.687                      | 0.094              | -0.194 |                  | -4.14%     | ok                 |                    |                             |                           |                      |                  |
| 53.999                  | 53.434                     | 1.069              | 0.565  |                  | 1.06%      | ok                 |                    |                             |                           |                      |                  |
| 36.593                  | 37.057                     | 0.741              | -0.464 |                  | -1.25%     | ok                 |                    |                             |                           |                      |                  |
| 21.998                  | 21.677                     | 0.434              | 0.321  |                  | 1.48%      | ok                 |                    |                             |                           |                      |                  |
| 0.799                   | 1.957                      | 0.039              | -1.158 |                  | -59.17%    | Ok (Frag. < 4 kb)  |                    |                             |                           |                      |                  |
| 0.013                   |                            | 0.000              | 0.013  |                  | -          | Ok (missing frag.) |                    |                             |                           |                      |                  |
| 44.262                  | 43.207                     | 0.864              | 1.055  |                  | 2.44%      | ok                 |                    |                             |                           |                      |                  |
| 2.93                    | 3.104                      | 0.062              | -0.174 |                  | -5.61%     | ok                 |                    |                             |                           |                      |                  |
| 4.525                   | 4.848                      | 0.097              | -0.323 |                  | -6.66%     | ok                 |                    |                             |                           |                      |                  |
| 1.085                   | 1.846                      | 0.037              | -0.761 |                  | -41.22%    | Ok (Frag. < 4 kb)  |                    |                             |                           |                      |                  |
| 26.689                  | 25.75                      | 0.515              | 0.939  |                  | 3.65%      | ok                 |                    |                             |                           |                      |                  |
| 12.22                   | 11.742                     | 0.235              | 0.478  |                  | 4.07%      | ok                 |                    |                             |                           |                      |                  |
| 12.884                  | 12.711                     | 0.254              | 0.173  | 1.36%            | ok         |                    |                    |                             |                           |                      |                  |
| 2.812                   | 2.857                      | 0.057              | -0.045 | -1.58%           | ok         |                    |                    |                             |                           |                      |                  |
| 6.347                   | 6.038                      | 0.121              | 0.309  | 5.12%            | ok         |                    |                    |                             |                           |                      |                  |
